# Supplementary figures and images for: Combing a double helix
Source: Royal Society of Chemistry journal article supplement (doi:10.1039/d1sm01533h), 2022-01-01

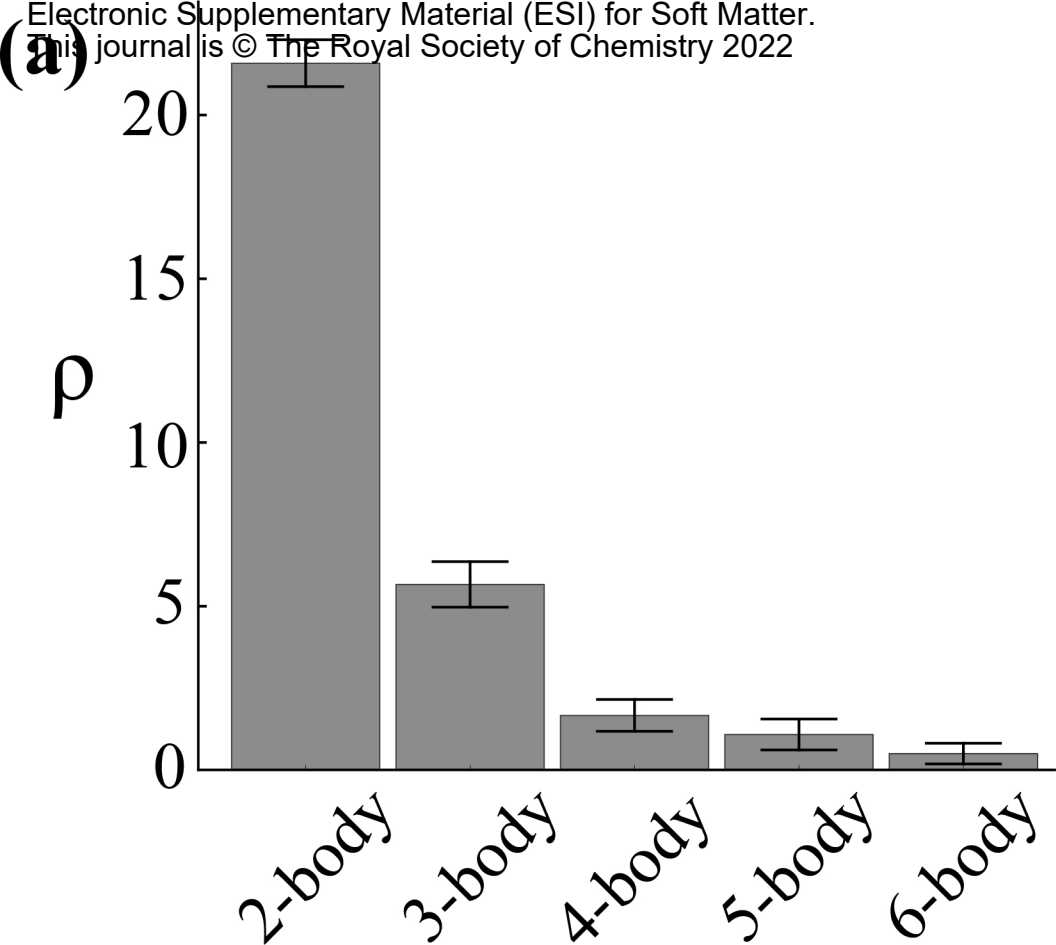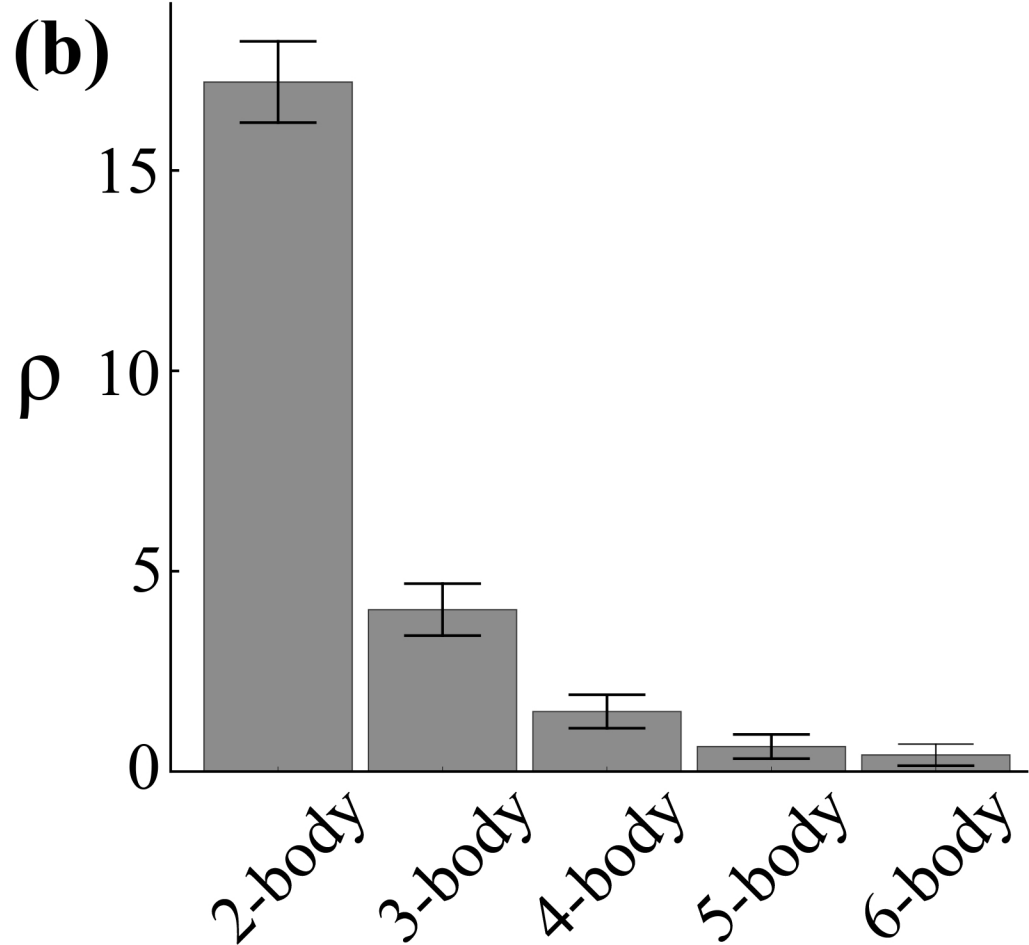

Supplement: d1sm01533h1.pdf [file d1sm01533h1.pdf]

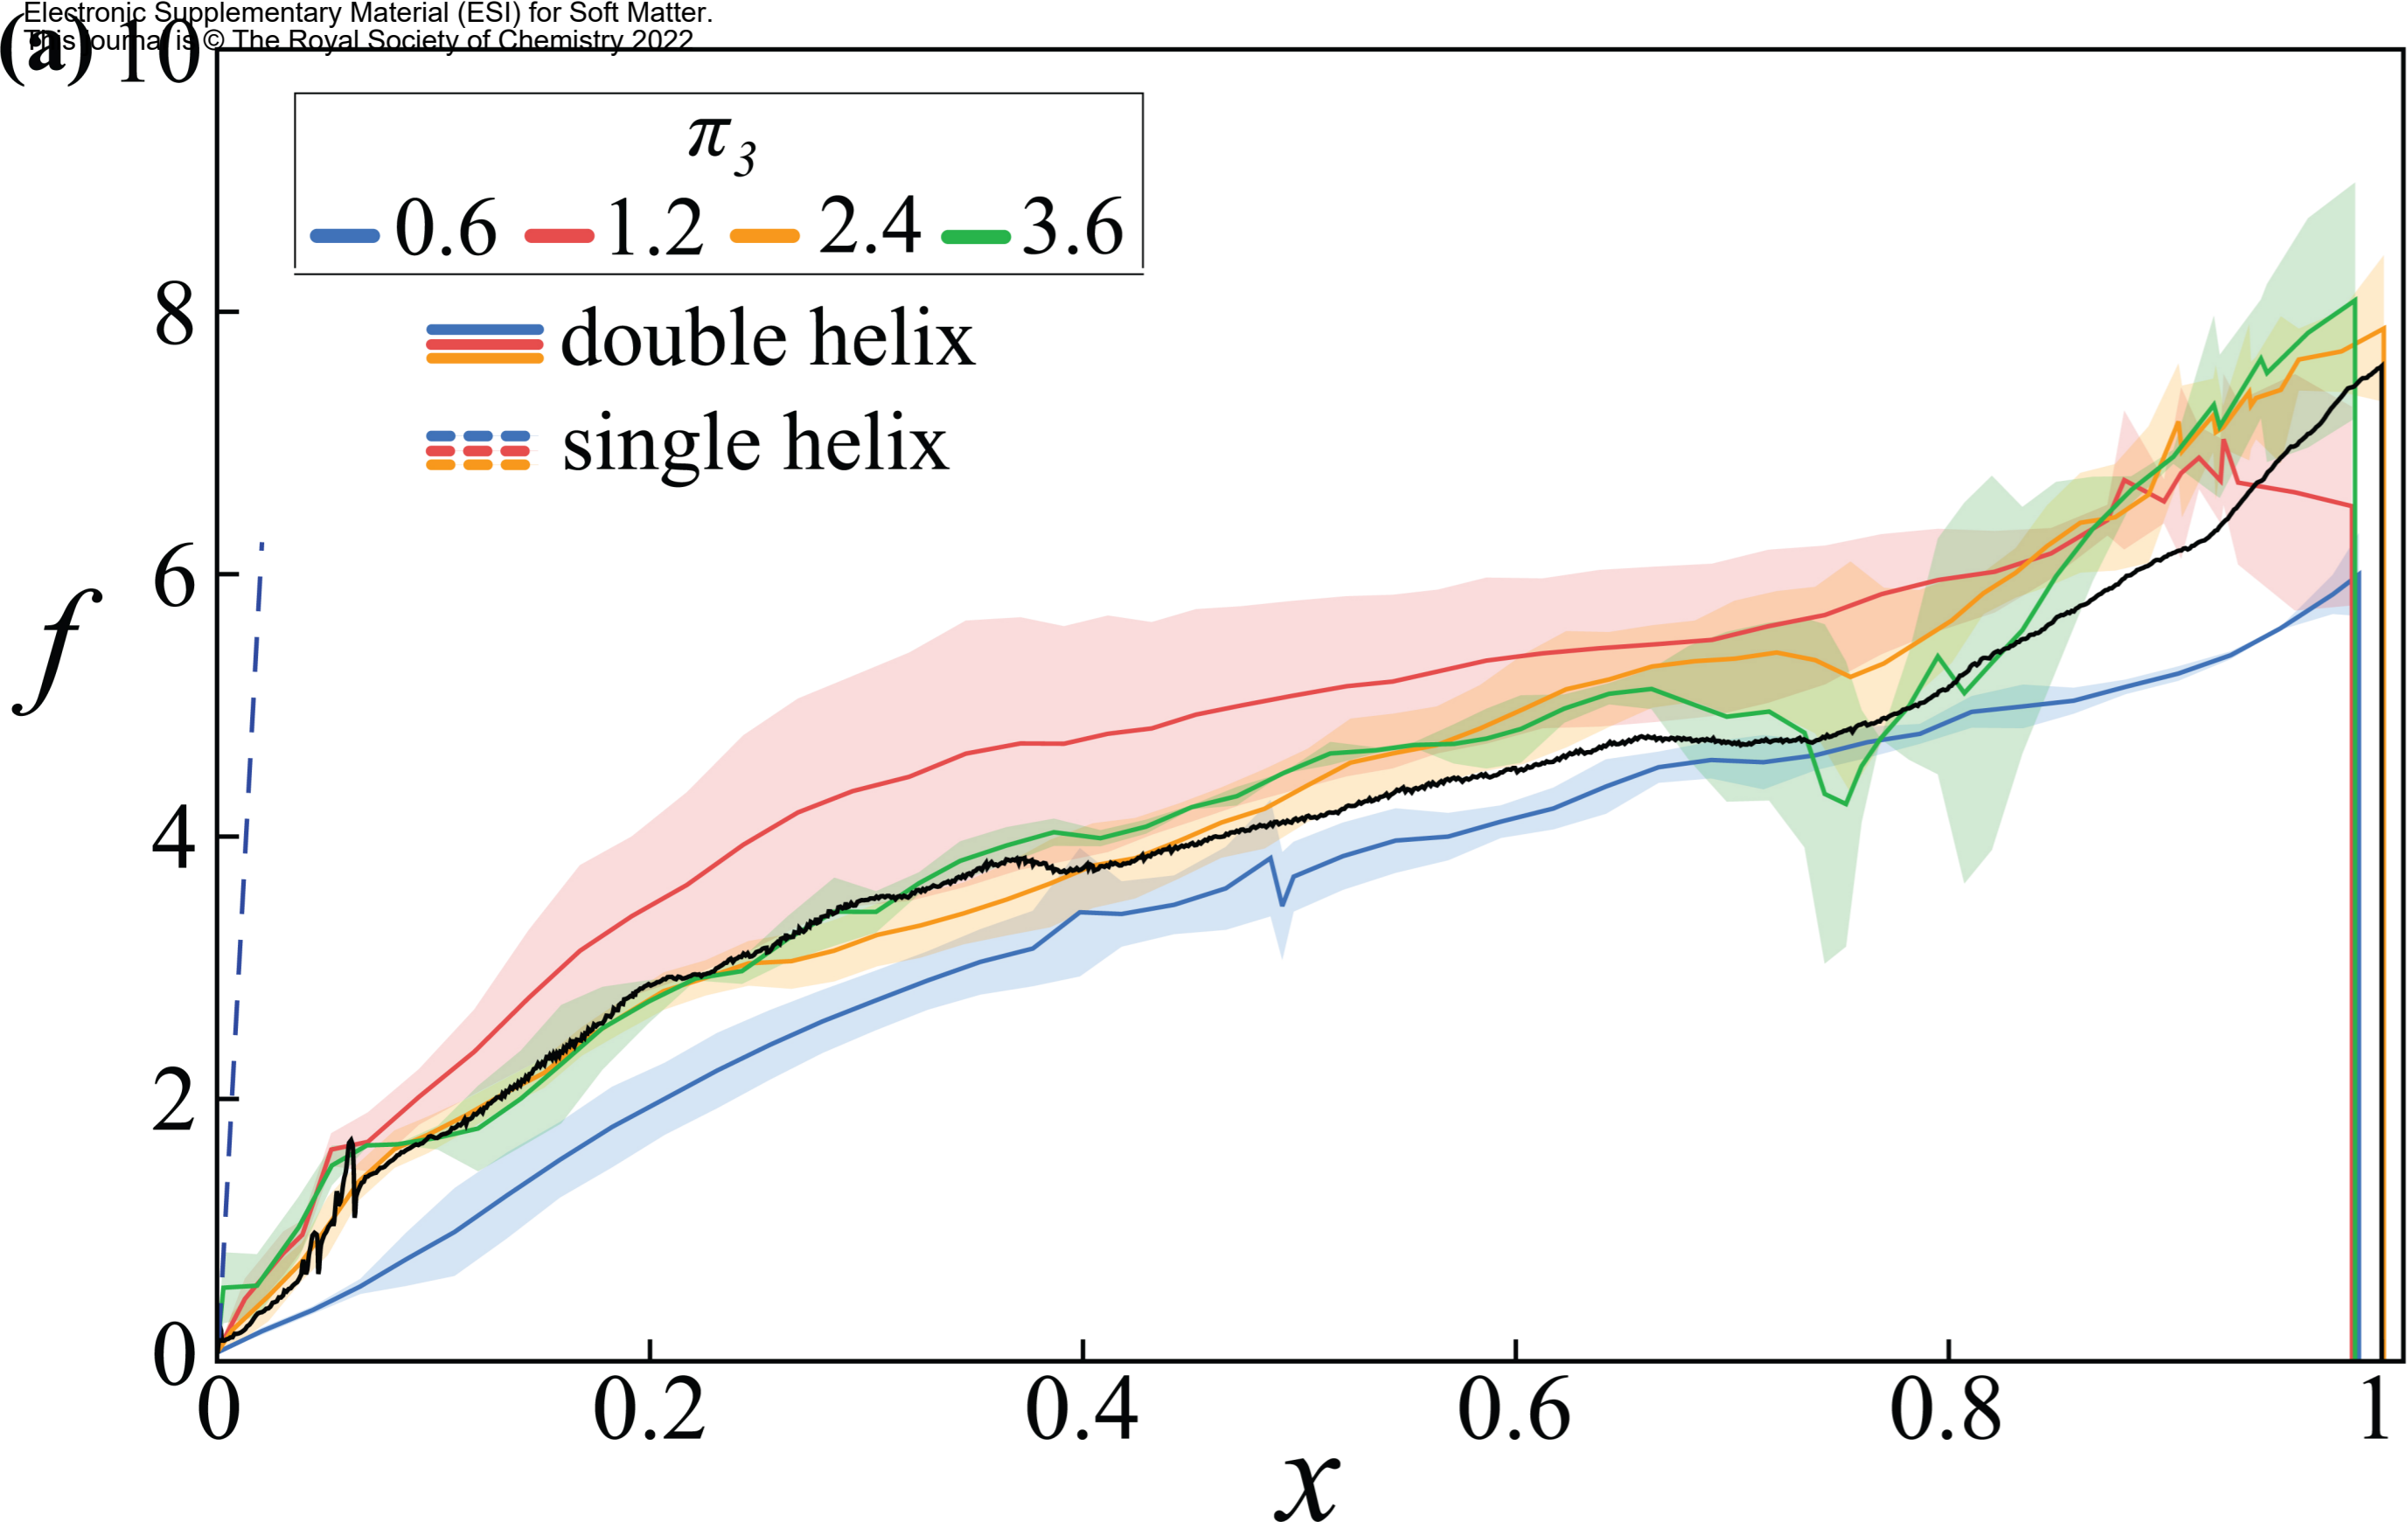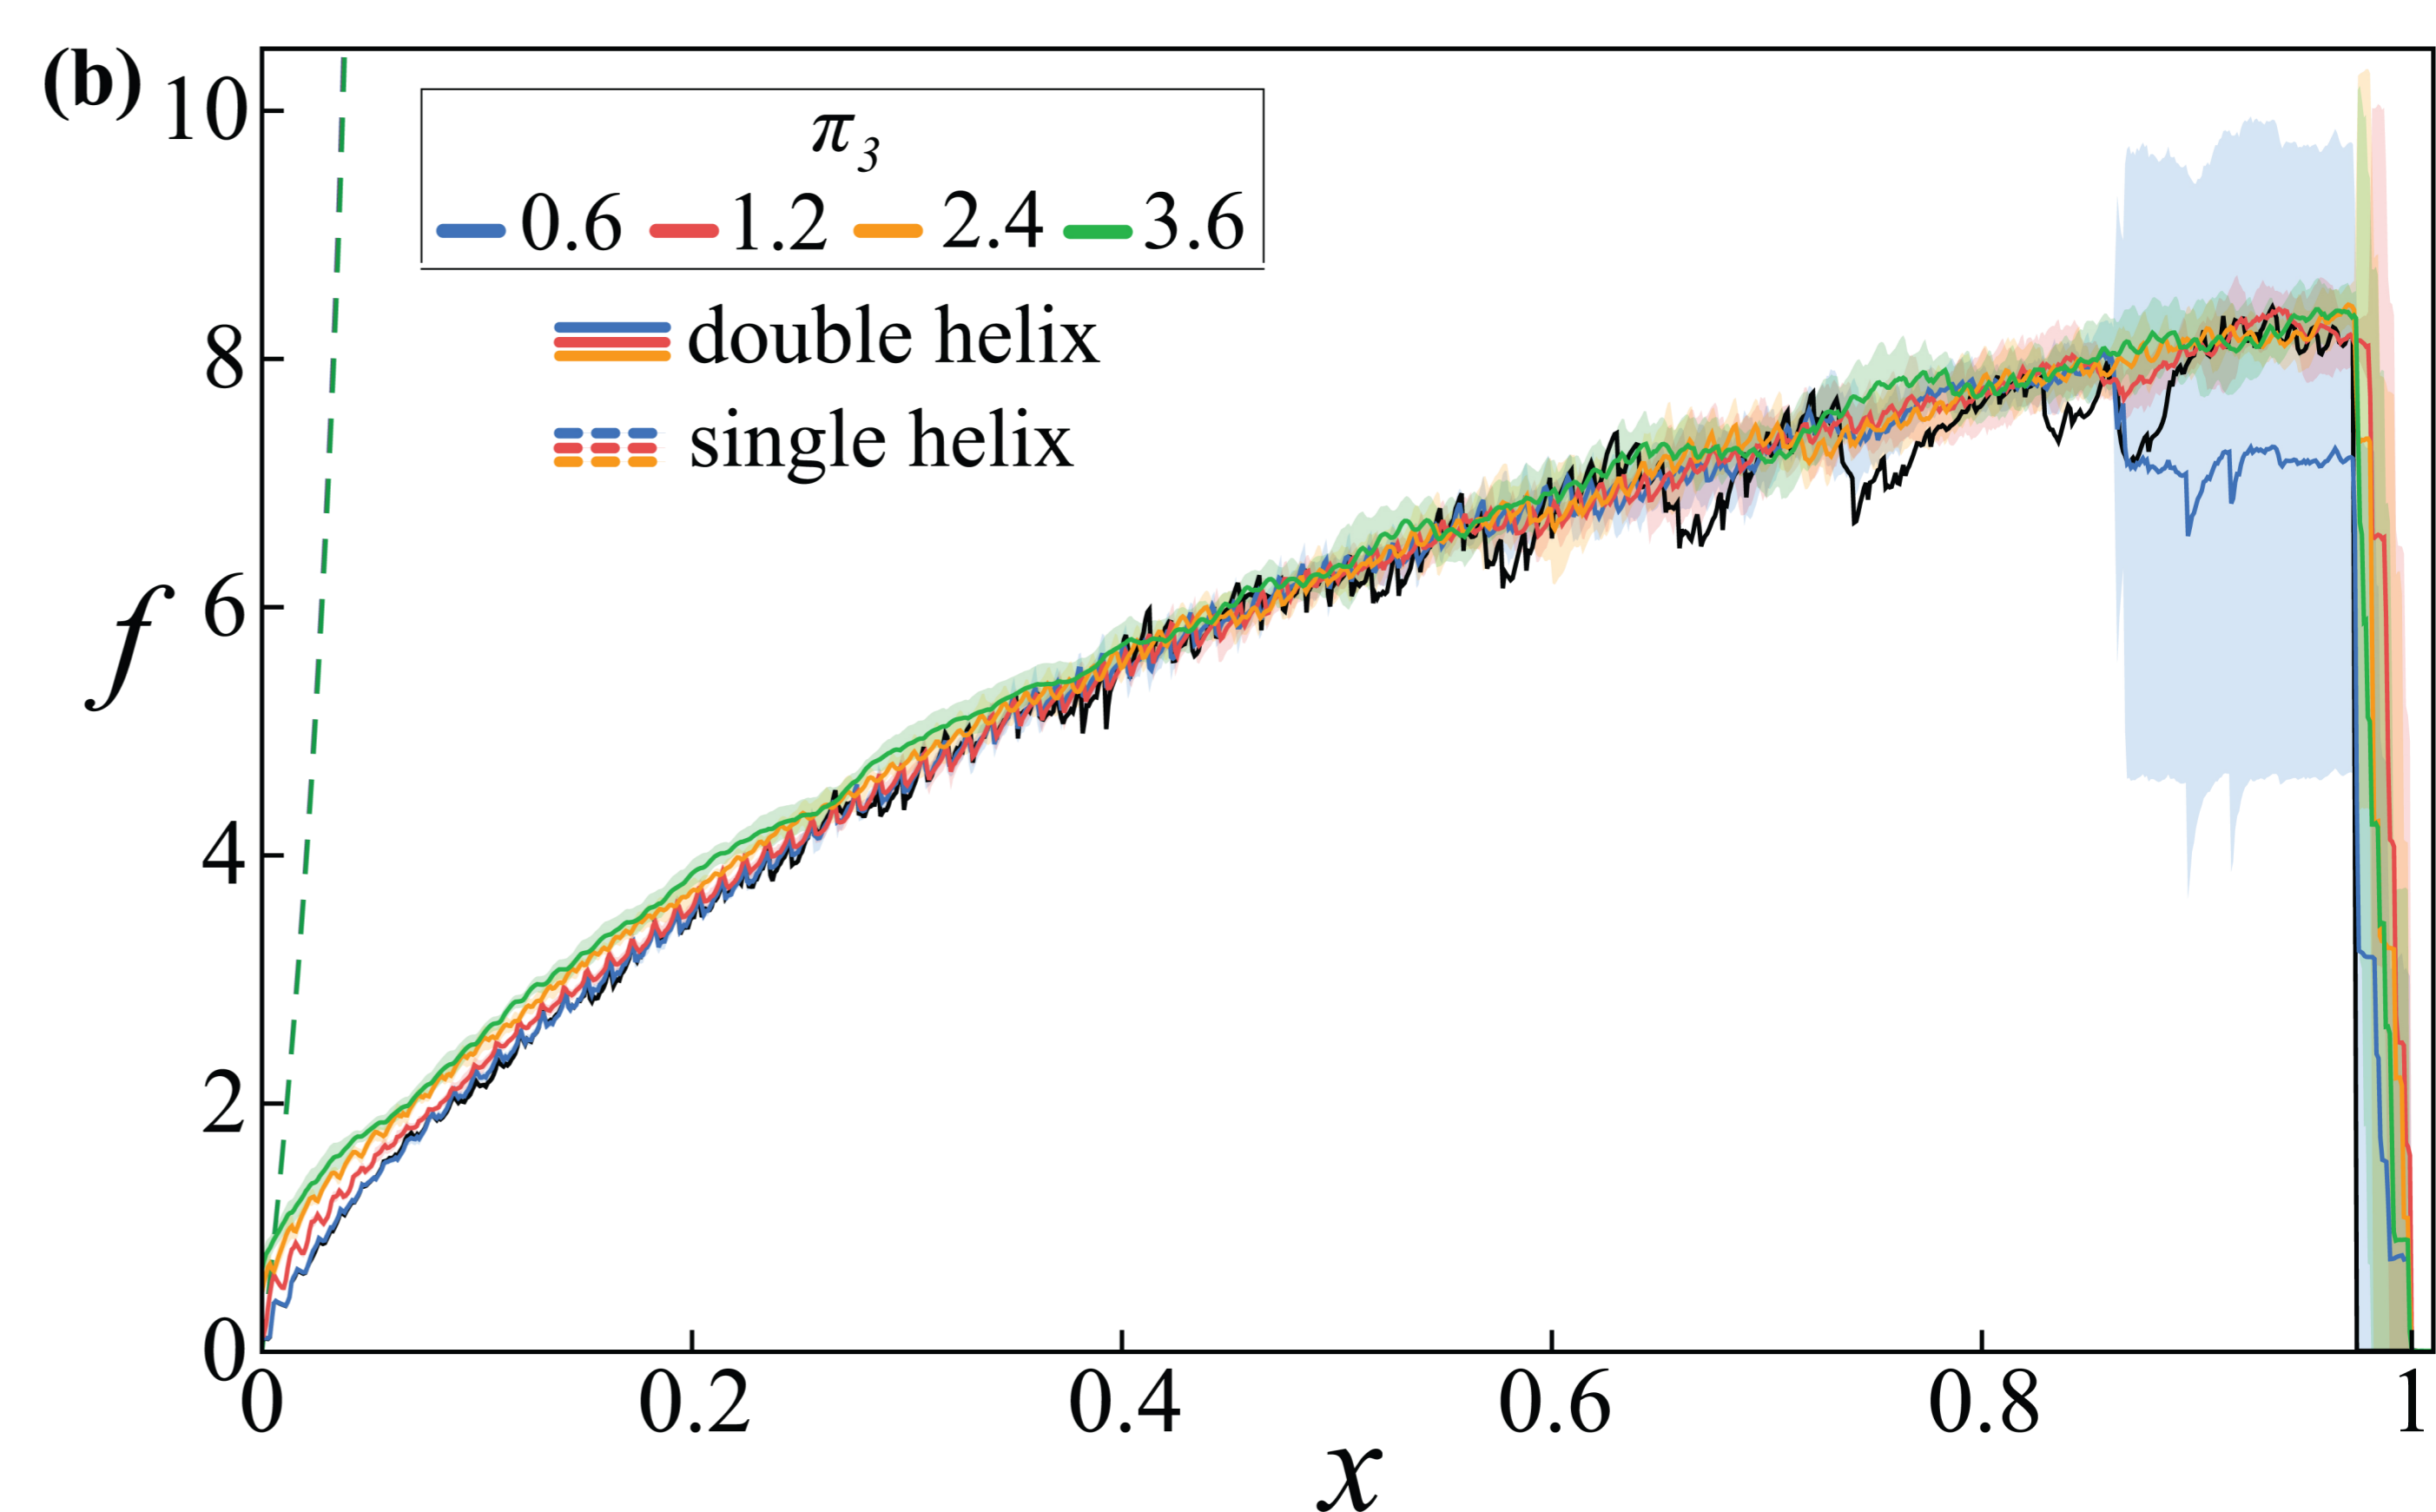

Supplement: d1sm01533h2.pdf [file d1sm01533h2.pdf]
